# Supplementary material
Source: ML conference proceedings conference paper supplement (https://openreview.net/forum?id=HCUksccuFx)
Supplement: supplementary_material [file attachment]

## A ADDITIONAL DETAILS OF THE DRAG ENCODING

Here, we give a formal definition of  $\text{enc}(\cdot, s)$  introduced in Section 3.2. Recall that  $\text{enc}(\cdot, s)$  encodes each drag  $d_k := (u_k, v_k^{1:N})$  into an embedding of shape  $N \times s \times s \times 6$ . For each frame  $n$ , the first, middle, and last two channels (of the  $c = 6$  in total) encode the spatial location of  $u_k$ ,  $v_k^n$  and  $v_k^N$  respectively. Formally,  $\text{enc}(d_k, s)[n, :, :, 2]$  is a tensor of all negative ones except for  $\text{enc}(d_k, s)[n, \lfloor \frac{s \cdot h}{H} \rfloor, \lfloor \frac{s \cdot w}{W} \rfloor, : 2] = (\frac{s \cdot h}{H} - \lfloor \frac{s \cdot h}{H} \rfloor, \frac{s \cdot w}{W} - \lfloor \frac{s \cdot w}{W} \rfloor)$  where  $u_k = (h, w) \in \Omega = \{1, \dots, H\} \times \{1, \dots, W\}$ . The other 4 channels are defined similarly with  $u_k$  replaced by  $v_k^n$  and  $v_k^N$ .

## B ADDITIONAL DETAILS OF DATA CURATION

### B.1 IMPLEMENTATION DETAILS

We use the categorization provided by Qiu et al. (2024) and exclude the 3D models classified as ‘Poor-Quality’ as a pre-filtering step prior to our proposed filtering pipelines (Section 4).

When using GPT-4V to filter Objaverse-Animation into Objaverse-Animation-HQ, we design the following prompt to cover a wide range of cases to be excluded:

**System:** You are a 3D artist, and now you are being shown some animation videos depicting an animated 3D asset. You are asked to filter out some animations.

You should filter out the animations that:

- 1) have trivial or no motion, i.e., the object is simply scaling, rotating, or moving as a whole without part-level dynamics;
- or 2) depict a scene and only a small component in the scene is moving;
- or 3) have motion that is imaginary, i.e., the motion is not the usual way of how the object moves and it’s hard for humans to anticipate;
- or 4) have very large global motion so that the object exits the frame partially or fully in one of the frames;
- or 5) have changes in object color that are not due to lighting changes;
- or 6) have motion that causes different parts of the same object to disconnect, overlap in an unnatural way, or disappear;
- or 7) have motion that is very chaotic, for example objects exploding or bursting apart.

**User:** For the following animation (as frames of a video), `frame1`, `frame2`, `frame3`, `frame4`, tell me, in a single word ‘Yes’ or ‘No’, whether the video should be filtered out or not.

The cost of GPT-4V data filtering is estimated to be \$500.

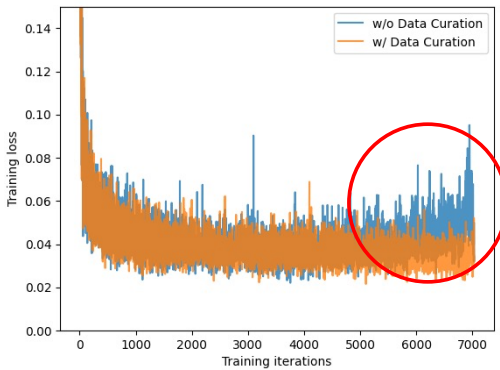

Figure 6: Data curation helps stabilize training.

| Setting           | PSNR↑        | SSIM↑         |
|-------------------|--------------|---------------|
| w/o Data Curation | 6.04         | 0.411         |
| w/ Data Curation  | <b>19.87</b> | <b>0.884</b>  |
| Setting           | LPIPS↓       | FVD↓          |
| w/o Data Curation | 0.703        | 1475.35       |
| w/ Data Curation  | <b>0.181</b> | <b>624.47</b> |

Table 3: Training on more abundant but lower-quality data leads to lower generation quality. Here, ‘w/o Data Curation’ model is trained on Objaverse-Animation while ‘w/ Data Curation’ model is trained on Objaverse-Animation-HQ. Both models are trained for 7K iterations. Evaluation is performed on the test split of Drag-a-Move.

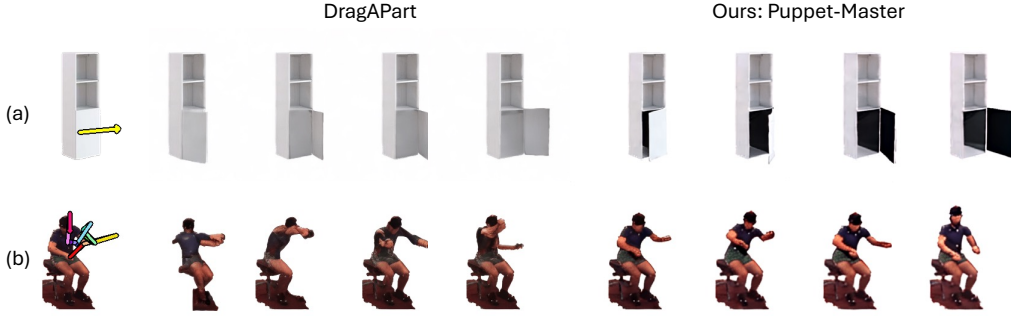

Figure 7: **Qualitative Comparison** with DragAPart. The videos generated by DragAPart lack temporal consistency: (a) the door initially opens to the left, but later it is switched to open to the right, and it partially closes between the second and third frames visualized here; (b) DragAPart fails to generalize to out-of-domain cases, resulting in distorted motion.

## B.2 LESS IS MORE: DATA CURATION HELPS AT SCALE

To verify that our data curation strategy from Section 4 is effective, we compare two models trained on Objaverse-Animation and Objaverse-Animation-HQ respectively under the same hyper-parameter setting. The training dynamics are visualized in Fig. 6. The optimization collapses towards 7k iterations when the model is trained on a less curated dataset, resulting in much lower-quality video samples (Table 3). This suggests that the data’s quality matters more than quantity at scale.

## C ADDITIONAL EXPERIMENT DETAILS

**Data.** Our final model is fine-tuned on the combined dataset of Drag-a-Move (Li et al., 2024c) and Objaverse-Animation-HQ (Section 4). During training, we balance over various types of part-level dynamics to control the data distribution. We achieve this by leveraging the categorization provided by Qiu et al. (2024) and sampling individual data points with the following hand-crafted distribution:  $p(\text{Drag-a-Move}) = 0.3$ ,  $p(\text{Objaverse-Animation-HQ, category 'Human-Shape'}) = 0.25$ ,  $p(\text{Objaverse-Animation-HQ, category 'Animals'}) = 0.25$ ,  $p(\text{Objaverse-Animation-HQ, category 'Daily-Used'}) = 0.05$ ,  $p(\text{Objaverse-Animation-HQ, other categories}) = 0.15$ .

**Architecture.** We zero-initialize the final convolutional layer of each adaptive normalization module before fine-tuning. With our introduced modules, the parameter count is pumped to 1.68B from the original 1.5B SVD.

**Training.** We fine-tune the base SVD on videos of  $256 \times 256$  resolution and  $N = 14$  frames with batch size 64 for 12, 500 iterations. We adopt SVD’s continuous-time noise scheduler, shifting the noise distribution towards more noise with  $\log \sigma \sim \mathcal{N}(0.7, 1.6^2)$ , where  $\sigma$  is the continuous noise level following the presentation in Blattmann et al. (2023a). The training takes roughly 10 days on a single Nvidia A6000 GPU where we accumulate gradient for 64 steps. We enable classifier-free guidance (CFG) (Ho & Salimans, 2022) by randomly dropping the conditional drags  $\mathcal{D}$  with a probability of 0.1 during training. Additionally, we track an exponential moving average of the weights at a decay rate of 0.9999.

**Inference.** Unless stated otherwise, the samples are generated using  $S = 50$  diffusion steps. We adopt the linearly increasing CFG (Blattmann et al., 2023a) with maximum guidance weight 5.0. Generating a single video roughly takes 20 seconds on an Nvidia A6000 GPU.

**Baselines.** For DragNUWA (Yin et al., 2023) and DragAnything (Wu et al., 2024), we use their publicly available checkpoints. They operate on a different aspect ratio (*i.e.*,  $576 \times 320$ ). Following previous work (Li et al., 2024c), we first pad the square input image  $y$  along the horizontal axis to the correct aspect ratio 1.8 and resize it to  $576 \times 320$ , and then remove the padding of the generated frames and resize them back to  $256 \times 256$ . We train DragAPart (Li et al., 2024c) for 100k iterations

using its official implementation on the same combined dataset of Drag-a-Move and Objaverse-Animation-HQ which we used for training PuppetMaster. Since DragAPart is an image-to-image model, we independently generate  $N$  frames conditioned on gradually extending drags to obtain the video. All metrics are computed on  $256 \times 256$  videos.
